# Supplementary material for: Cloning of Three Cytokinin Oxidase/Dehydrogenase Genes in Bambusa oldhamii
Source: MDPI journal article supplement (doi:10.3390/cimb45030123), 2023-02-27
Supplement: s1 [file s1]

## Supplementary materials

### Cloning of three cytokinin oxidase/dehydrogenase genes in *Bambusa oldhamii*

Chun-Yen Hsieh<sup>1</sup>, GiGi Chin Wen Lim<sup>2</sup>, and Lu-Sheng Hsieh<sup>2\*</sup>

<sup>1</sup>Department of Pathology and Laboratory Medicine, Shin Kong Wu Ho-Su Memorial Hospital, No. 95, Wen Chang Road, Shih Lin District, Taipei City 111, Taiwan.

<sup>2</sup>Department of Food Science, Tunghai University, No. 1727, Sec. 4, Taiwan Boulevard, Xitun District, Taichung 40704, Taiwan.

\*Corresponding author E-mail: [ls hsieh@thu.edu.tw](mailto:ls hsieh@thu.edu.tw)

Tel.: 886-4-23590121#37331

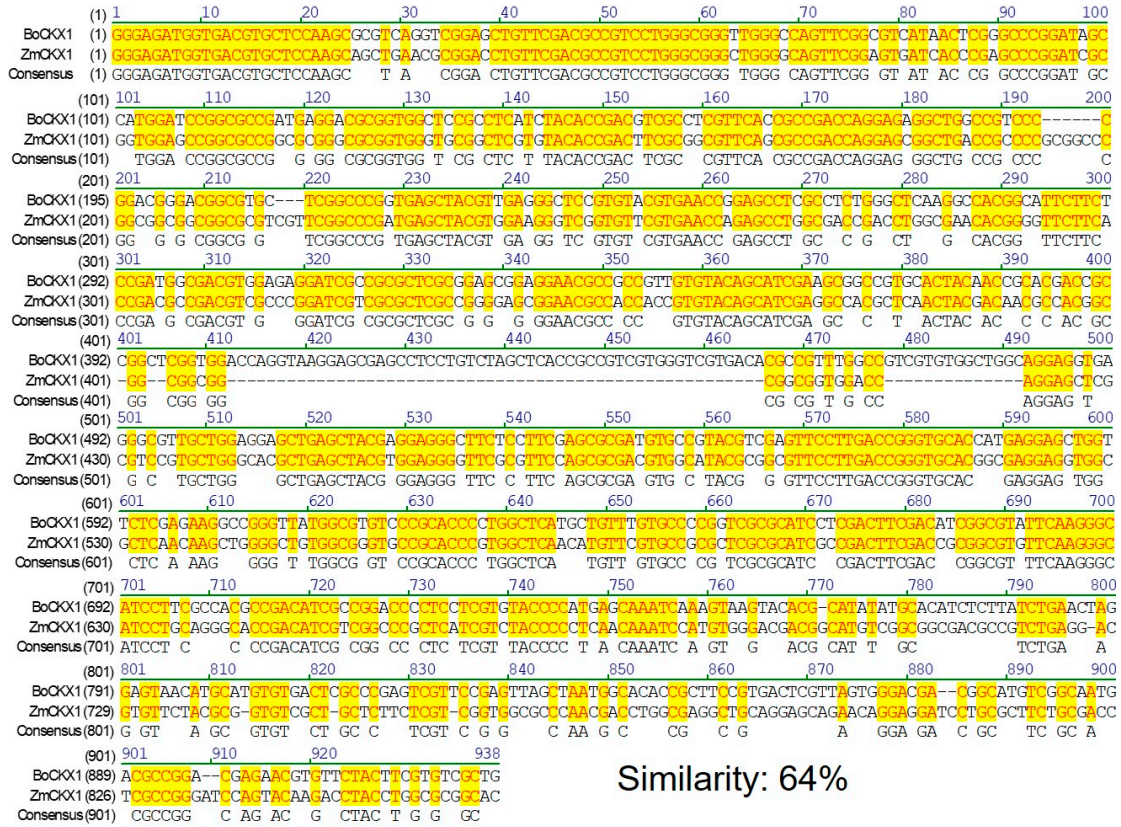

**Figure S1.** Alignment of the deduced amino acid sequences of *BoCKX*-specific probe and *ZmCKX1*.
